# Supplementary material for: The Genomic Basis of Postponed Senescence in Drosophila melanogaster
Source: PLoS One. 2015 Sep 17;10(9):e0138569. doi: 10.1371/journal.pone.0138569 (PMC4574564; doi:10.1371/journal.pone.0138569)
Supplement: S7 Table — (XLSX) [file pone.0138569.s007.xlsx]

## Sheet: S7 Table
Sex	Window (Chromosome_Position)	FlyBase ID	Gene Symbol	Population FDR	Age FDR	Age x Population FDR
Females	2L_22500000_23000000	FBgn0000384	cta	0.261	0.338	0.0155
	2L_22500000_23000000	FBgn0002566	lt	0.982	0.0393	0.00682
	2L_22500000_23000000	FBgn0041004	CG17715	0.701	0.922	0.0253
	2L_22500000_23000000	FBgn0058005	CG40005	0.131	0.519	0.989
	2L_22500000_23000000	FBgn0058006	CG40006	0.757	0.972	0.0193
	2L_22500000_23000000	FBgn0058439	CG40439	0.439	0.685	0.0385
	2L_22500000_23000000	FBgn0086683	Spf45	0.579	0.00889	0.0381
	2L_22500000_23000000	FBgn0250907	Cht3	0.2	0.7	0.975
	2L_22500000_23000000	FBgn0262887	CR43242	0.289	0.755	0.602
	2L_22500000_23000000	FBgn0264548	CR43927	0.593	0.875	0.0211
	2R_0_500000	FBgn0040007	RpL38	0.0431	0.55	0.0102
	2R_0_500000	FBgn0046692	Stlk	0.883	0.596	0.00872
	2R_0_500000	FBgn0260798	Gprk1	0.595	0.15	0.0307
	2R_0_500000	FBgn0260799	p120ctn	0.329	0.316	0.00791
	2R_0_500000	FBgn0262115	CG17683	0.942	0.0367	0.0178
	2R_0_500000	FBgn0262116	CG40127	0.634	0.0368	0.0108
	2R_0_500000	FBgn0262117	IntS3	0.183	0.0208	0.0038
	2R_0_500000	FBgn0264909	CR44100	0.941	0.597	0.867
	2R_500000_1000000	FBgn0013348	TpnC41C	0.392	4.68e-08	0.00784
	2R_500000_1000000	FBgn0026401	Nipped-B	0.0897	0.499	0.102
	2R_500000_1000000	FBgn0032997	CG17486	0.734	0.104	0.00339
	2R_500000_1000000	FBgn0033000	CG14464	0.782	0.674	0.0316
	2R_500000_1000000	FBgn0033005	CG3107	0.235	0.0545	0.0288
	2R_500000_1000000	FBgn0039994	conu	0.208	0.222	0.0187
	2R_500000_1000000	FBgn0040005	CG17883	0.622	0.406	0.0141
	2R_500000_1000000	FBgn0040849	Ir41a	0.712	0.0404	0.967
	2R_500000_1000000	FBgn0084049	CR41440	0.686	0.671	0.641
	2R_500000_1000000	FBgn0250830	CG12547	0.851	0.296	0.00713
	2R_500000_1000000	FBgn0261387	CG17528	0.269	0.654	0.0132
	2R_500000_1000000	FBgn0262970	CR43281	0.75	0.00114	0.975
	2R_500000_1000000	FBgn0264910	CR44101	0.146	0.115	0.114
	2R_500000_1000000	FBgn0264911	CG44102	0.514	0.637	0.356
	2R_500000_1000000	FBgn0264914	CR44105	0.284	0.734	0.431
	2R_500000_1000000	FBgn0267027	CR45471	0.677	0.844	0.382
	2R_1000000_1500000	FBgn0026238	gus	0.164	0.672	0.0236
	2R_1000000_1500000	FBgn0033010	Atf6	0.108	0.425	0.0564
	2R_1000000_1500000	FBgn0033015	d4	0.972	0.147	0.0172
	2R_1000000_1500000	FBgn0033017	CG10465	0.765	0.0556	0.00859
	2R_1000000_1500000	FBgn0033019	CG10395	0.713	0.0594	0.00598
	2R_1000000_1500000	FBgn0033020	CG10396	0.502	0.733	0.519
	2R_1000000_1500000	FBgn0033021	CG10417	0.37	0.128	0.00859
	2R_1000000_1500000	FBgn0033027	TpnC4	0.224	3.6e-07	0.00824
	2R_1000000_1500000	FBgn0039969	Fis1	0.0583	0.483	0.00564
	2R_1000000_1500000	FBgn0039970	CG17508	0.393	0.816	0.00952
	2R_1000000_1500000	FBgn0050438	CG30438	0.354	0.0905	0.00164
	2R_1000000_1500000	FBgn0050440	CG30440	0.443	0.0803	0.00136
	2R_1000000_1500000	FBgn0050441	CG30441	0.654	0.0171	0.0482
	2R_1000000_1500000	FBgn0053554	Nipped-A	0.347	0.442	0.309
	2R_1000000_1500000	FBgn0084008	CR41443	0.74	0.405	0.981
	2R_1000000_1500000	FBgn0259247	laccase2	0.851	0.422	0.76
	2R_1000000_1500000	FBgn0261403	sxc	0.735	0.894	0.0235
	2R_1000000_1500000	FBgn0261429	CR42646	0.575	0.097	0.925
	2R_1000000_1500000	FBgn0262901	CR43256	0.529	0.367	0.255
	3L_23000000_23500000	FBgn0010215	alpha-Cat	0.267	0.0505	0.00878
	3L_23000000_23500000	FBgn0024733	RpL10	0.00543	0.411	0.0194
	3L_23000000_23500000	FBgn0052230	CG32230	0.463	2.61e-07	0.502
	3L_23000000_23500000	FBgn0052350	CG32350	0.705	0.714	0.0233
	3L_23000000_23500000	FBgn0053217	CG33217	0.665	0.184	0.0675
	3L_23000000_23500000	FBgn0054031	CG34031	0.591	0.961	0.698
	3L_23000000_23500000	FBgn0262509	nrm	0.935	1.77e-08	0.000238
	3L_23000000_23500000	FBgn0264492	CkIIalpha	0.529	0.155	0.00776
	3L_23000000_23500000	FBgn0264698	CR43967	0.0575	1.18e-05	0.0018
	3L_23000000_23500000	FBgn0266347	nAChRalpha4	0.594	0.498	0.00654
	3L_23000000_23500000	FBgn0266657	CR45164	0.834	0.583	0.0112
	3L_23000000_23500000	FBgn0267299	CR45735	0.331	0.583	0.308
Males	2R_0_500000	FBgn0040007	RpL38	0.862	1.05e-13	0.000725
	2R_0_500000	FBgn0046692	Stlk	0.0275	0.00546	0.0402
	2R_0_500000	FBgn0260798	Gprk1	0.811	8.99e-12	0.00791
	2R_0_500000	FBgn0260799	p120ctn	0.994	0.00014	0.235
	2R_0_500000	FBgn0262115	CG17683	0.998	1.31e-06	0.000243
	2R_0_500000	FBgn0262116	CG40127	0.553	0.605	0.52
	2R_0_500000	FBgn0262117	IntS3	0.258	1.1e-10	0.00109
	2R_0_500000	FBgn0264909	CR44100	0.294	0.981	0.946
	2R_500000_1000000	FBgn0013348	TpnC41C	0.0744	4.8e-13	3.71e-05
	2R_500000_1000000	FBgn0026401	Nipped-B	0.183	3.85e-15	0.00209
	2R_500000_1000000	FBgn0032997	CG17486	0.261	5.13e-06	0.000291
	2R_500000_1000000	FBgn0033000	CG14464	0.741	3.26e-07	0.0169
	2R_500000_1000000	FBgn0033005	CG3107	0.485	0.000678	0.0923
	2R_500000_1000000	FBgn0039979	CR40282	0.912	0.101	0.813
	2R_500000_1000000	FBgn0039994	conu	0.0551	3.38e-13	0.00533
	2R_500000_1000000	FBgn0040005	CG17883	0.819	1.34e-07	0.436
	2R_500000_1000000	FBgn0040849	Ir41a	0.852	0.00322	0.89
	2R_500000_1000000	FBgn0084049	CR41440	0.959	0.684	0.873
	2R_500000_1000000	FBgn0250830	CG12547	0.819	4.48e-10	0.132
	2R_500000_1000000	FBgn0261387	CG17528	0.817	7.03e-08	0.784
	2R_500000_1000000	FBgn0262970	CR43281	0.987	7.23e-06	0.862
	2R_500000_1000000	FBgn0264910	CR44101	0.872	1.66e-06	0.333
	2R_500000_1000000	FBgn0264911	CG44102	0.85	0.0844	0.0808
	2R_500000_1000000	FBgn0264914	CR44105	0.805	0.00779	0.4
	2R_500000_1000000	FBgn0267027	CR45471	0.899	0.113	0.303
	2R_1000000_1500000	FBgn0026238	gus	0.922	1.27e-05	0.0428
	2R_1000000_1500000	FBgn0033010	Atf6	0.201	2.29e-09	0.0193
	2R_1000000_1500000	FBgn0033015	d4	0.677	0.929	0.326
	2R_1000000_1500000	FBgn0033017	CG10465	0.861	0.0405	0.833
	2R_1000000_1500000	FBgn0033019	CG10395	0.998	3.13e-05	0.00305
	2R_1000000_1500000	FBgn0033020	CG10396	0.879	1.17e-10	0.000304
	2R_1000000_1500000	FBgn0033021	CG10417	0.853	6.84e-07	0.0439
	2R_1000000_1500000	FBgn0033027	TpnC4	0.156	8.95e-10	0.00671
	2R_1000000_1500000	FBgn0039969	Fis1	0.391	0.032	0.162
	2R_1000000_1500000	FBgn0039970	CG17508	0.727	4.92e-13	3.27e-06
	2R_1000000_1500000	FBgn0050438	CG30438	0.455	4.97e-12	4.86e-07
	2R_1000000_1500000	FBgn0050440	CG30440	0.117	1.23e-05	0.392
	2R_1000000_1500000	FBgn0050441	CG30441	0.865	0.00529	0.054
	2R_1000000_1500000	FBgn0053554	Nipped-A	0.86	3.25e-13	0.00235
	2R_1000000_1500000	FBgn0084008	CR41443	0.947	1.57e-06	0.0473
	2R_1000000_1500000	FBgn0259247	laccase2	0.773	2.46e-08	0.552
	2R_1000000_1500000	FBgn0261403	sxc	0.495	0.00071	0.0034
	2R_1000000_1500000	FBgn0261429	CR42646	0.398	1.7e-07	0.0452
	2R_1000000_1500000	FBgn0262901	CR43256	0.983	0.342	0.418
